# Supplementary material
Source: PubMed Central journal article supplement (PMC7429272)
Supplement: NIHMS1608287-supplement-COA.pdf [file NIHMS1608287-supplement-COA.pdf]

**Change of Authorship Form**  
(Must be completed and signed by ALL authors)

Please check all that apply

New author(s) have been added.

There is a change in the order of authorship.

An author wishes to remove his/her name. An author's name may only be removed at his/her own request and a letter signed by the author should accompany this form.

Manuscript Number HYPE/2020/15504 R1

Manuscript Title Pregnancy protects hyperandrogenemic female rats from postmenopausal hypertension.

**FORMER AUTHORSHIP**

Please list ALL AUTHORS in the same order as the original submission. For more than 12 use an extra sheet.

| Print Name |                           | Print Name |  |
|------------|---------------------------|------------|--|
| Name (1)   | <u>Noha M. Shawky</u>     | Name (7)   |  |
| Name (2)   | <u>Chetan N. Patel</u>    | Name (8)   |  |
| Name (3)   | <u>Carolina Dalmasco</u>  | Name (9)   |  |
| Name (4)   | <u>Rodrigo O. Maraca</u>  | Name (10)  |  |
| Name (5)   | <u>Damian C. Romero</u>   | Name (11)  |  |
| Name (6)   | <u>Jane F. Reckelhoff</u> | Name (12)  |  |

**NEW AUTHORSHIP**-All authors must sign below agreeing to the new changes in authorship. The authorship order must match the new title page of the manuscript.

|           |                           |           |                           |      |                 |
|-----------|---------------------------|-----------|---------------------------|------|-----------------|
| Name (1)  | <u>Noha M. Shawky</u>     | Signature | <u>Noha Shawky</u>        | Date | <u>6/8/2020</u> |
| Name (2)  | <u>Chetan N. Patel</u>    | Signature | <u>[Signature]</u>        | Date | <u>6/9/2020</u> |
| Name (3)  | <u>Carolina Dalmasco</u>  | Signature |                           | Date |                 |
| Name (4)  | <u>Rodrigo O. Maraca</u>  | Signature |                           | Date |                 |
| Name (5)  | <u>Damian C. Romero</u>   | Signature | <u>[Signature]</u>        | Date | <u>6/8/2020</u> |
| Name (6)  | <u>Heather A. Drummen</u> | Signature | <u>[Signature]</u>        | Date | <u>6/8/2020</u> |
| Name (7)  | <u>Jane F. Reckelhoff</u> | Signature | <u>Jane F. Reckelhoff</u> | Date | <u>06/07/20</u> |
| Name (8)  |                           | Signature |                           | Date |                 |
| Name (9)  |                           | Signature |                           | Date |                 |
| Name (10) |                           | Signature |                           | Date |                 |
| Name (11) |                           | Signature |                           | Date |                 |
| Name (12) |                           | Signature |                           | Date |                 |

Please fax to 214-706-1565 or email [hypertension@heart.org](mailto:hypertension@heart.org).

**Change of Authorship Form**  
(Must be completed and signed by ALL authors)

Please check all that apply

- New author(s) have been added.  
 There is a change in the order of authorship.  
 An author wishes to remove his/her name. An author's name may only be removed at his/her own request and a letter signed by the author should accompany this form.

Manuscript Number HYPE/2020/15504 R1

Manuscript Title Pregnancy protects hyperandrogenemic female rats from postmenopausal hypertension.

**FORMER AUTHORSHIP**

Please list ALL AUTHORS in the same order as the original submission. For more than 12 use an extra sheet.

| Print Name |                           | Print Name |  |
|------------|---------------------------|------------|--|
| Name (1)   | <u>Noha M. Shawky</u>     | Name (7)   |  |
| Name (2)   | <u>Chetan N. Patel</u>    | Name (8)   |  |
| Name (3)   | <u>Carolina Dalmasco</u>  | Name (9)   |  |
| Name (4)   | <u>Rodrigo D. Mavroun</u> | Name (10)  |  |
| Name (5)   | <u>Damian C. Romero</u>   | Name (11)  |  |
| Name (6)   | <u>Jane F. Reckelhoff</u> | Name (12)  |  |

**NEW AUTHORSHIP**-All authors must sign below agreeing to the new changes in authorship. The authorship order must match the new title page of the manuscript.

|           |                           |           |                           |      |                 |
|-----------|---------------------------|-----------|---------------------------|------|-----------------|
| Name (1)  | <u>Noha M. Shawky</u>     | Signature | <u>Noha Shawky</u>        | Date | <u>6/8/2020</u> |
| Name (2)  | <u>Chetan N. Patel</u>    | Signature |                           | Date |                 |
| Name (3)  | <u>Carolina Dalmasco</u>  | Signature | <u>[Signature]</u>        | Date | <u>6/8/2020</u> |
| Name (4)  | <u>Rodrigo D. Mavroun</u> | Signature |                           | Date |                 |
| Name (5)  | <u>Damian C. Romero</u>   | Signature | <u>[Signature]</u>        | Date | <u>6/8/2020</u> |
| Name (6)  | <u>Heather A. Drummen</u> | Signature | <u>[Signature]</u>        | Date | <u>6/8/2020</u> |
| Name (7)  | <u>Jane F. Reckelhoff</u> | Signature | <u>Jane F. Reckelhoff</u> | Date | <u>06/07/20</u> |
| Name (8)  |                           | Signature |                           | Date |                 |
| Name (9)  |                           | Signature |                           | Date |                 |
| Name (10) |                           | Signature |                           | Date |                 |
| Name (11) |                           | Signature |                           | Date |                 |
| Name (12) |                           | Signature |                           | Date |                 |

Please fax to 214-706-1565 or email [hypertension@heart.org](mailto:hypertension@heart.org).

**From:** Jane F. Reckelhoff  
**To:** [Hypertension](#)  
**Subject:** Fw: [EXTERNAL]Re: Change of authors for Hypertension paper  
**Date:** Tuesday, June 9, 2020 2:58:54 PM

---

\*\*\* **CAUTION:** This email originated from outside of the **American Heart Association**. Do **not** click links or open attachments unless you recognize the sender and know the content is safe. \*\*\*

Renata, see below.

Jane F. Reckelhoff, Ph.D.  
Billy S. Guyton Distinguished Professor  
Chair, Department of Cell and Molecular Biology  
Director, Women's Health Research Center  
Director, Mississippi Center of Excellence in Perinatal Research  
University of Mississippi Medical Center  
2500 N. State Street  
Jackson, MS 39216-4505  
Phone: 601-984-1502  
Biochemistry Office: R337  
Lab Office: G351-02  
Labs: G352-353

---

**From:** Rodrigo Oscar Marañón <rmaranon@fm.unt.edu.ar>  
**Sent:** Monday, June 8, 2020 8:31 PM  
**To:** Jane F. Reckelhoff <jreckelhoff@umc.edu>  
**Subject:** [EXTERNAL]Re: Change of authors for Hypertension paper

Hi Janie,  
Please, see attach.  
Let me know if you need something else from me.

Thanks,

**Change of Authorship Form**  
(Must be completed and signed by ALL authors)

Please check all that apply

- New author(s) have been added.  
 There is a change in the order of authorship.  
 An author wishes to remove his/her name. An author's name may only be removed at his/her own request and a letter signed by the author should accompany this form.

Manuscript Number HYPE/2020/15504 R1  
 Manuscript Title Pregnancy predicts hyperandrogenemic female rats from postmenopausal hypertension.

**FORMER AUTHORSHIP**

Please list ALL AUTHORS in the same order as the original submission. For more than 12 use an extra sheet.

| Print Name |                            | Print Name |  |
|------------|----------------------------|------------|--|
| Name (1)   | <u>Noha M. Shawkly</u>     | Name (7)   |  |
| Name (2)   | <u>Christa N. Patel</u>    | Name (8)   |  |
| Name (3)   | <u>Carolina Dalmasco</u>   | Name (9)   |  |
| Name (4)   | <u>Rodrigo D. Maranhão</u> | Name (10)  |  |
| Name (5)   | <u>Amelia C. Romero</u>    | Name (11)  |  |
| Name (6)   | <u>Jane F. Reckelhoff</u>  | Name (12)  |  |

**NEW AUTHORSHIP**-All authors must sign below agreeing to the new changes in authorship. The authorship order must match the new title page of the manuscript.

|           |                            |           |                           |      |                 |
|-----------|----------------------------|-----------|---------------------------|------|-----------------|
| Name (1)  | <u>Noha M. Shawkly</u>     | Signature | <u>Noha Shawkly</u>       | Date | <u>6/8/2020</u> |
| Name (2)  | <u>Christa N. Patel</u>    | Signature |                           | Date |                 |
| Name (3)  | <u>Caroline Dalmasco</u>   | Signature |                           | Date |                 |
| Name (4)  | <u>Rodrigo D. Maranhão</u> | Signature | <u>Rodrigo D Maranhão</u> | Date | <u>6/8/2020</u> |
| Name (5)  | <u>Amelia C. Romero</u>    | Signature |                           | Date | <u>6/8/2020</u> |
| Name (6)  | <u>Heather A. Drummond</u> | Signature | <u>Heather A Drummond</u> | Date | <u>6/8/2020</u> |
| Name (7)  | <u>Jane F. Reckelhoff</u>  | Signature | <u>Jane F. Reckelhoff</u> | Date | <u>6/8/2020</u> |
| Name (8)  |                            | Signature |                           | Date |                 |
| Name (9)  |                            | Signature |                           | Date |                 |
| Name (10) |                            | Signature |                           | Date |                 |
| Name (11) |                            | Signature |                           | Date |                 |
| Name (12) |                            | Signature |                           | Date |                 |

Please fax to 214-706-1565 or email hypertension@heart.org.

On 8 Jun 2020, at 11:52, Jane F. Reckelhoff <jreckelhoff@umc.edu> wrote:

Everyone, can you please print the form, sign it by your name, and send it back to me? This is to add Heather Drummond to the paper for helping us with the stats.

Thanks, Janie

Jane F. Reckelhoff, Ph.D.  
 Billy S. Guyton Distinguished Professor  
 Chair, Department of Cell and Molecular Biology  
 Director, Women's Health Research Center  
 Director, Mississippi Center of Excellence in Perinatal Research

University of Mississippi Medical Center  
2500 N. State Street  
Jackson, MS 39216-4505  
Phone: 601-984-1502  
Biochemistry Office: R337  
Lab Office: G351-02  
Labs: G352-353

---

**From:** MMC2068@umc.edu <MMC2068@umc.edu>

**Sent:** Monday, June 8, 2020 9:26 AM

**To:** Jane F. Reckelhoff <jreckelhoff@umc.edu>

**Subject:**

Individuals who have received this information in error or are not authorized to receive it must promptly return or dispose of the information and notify the sender. Those individuals are hereby notified that they are strictly prohibited from reviewing, forwarding, printing, copying, distributing or using this information in any way.

<image2020-06-08-082627.pdf>
